# Supplementary material for: Hsp90 Orchestrates Transcriptional Regulation by Hsf1 and Cell Wall Remodelling by MAPK Signalling during Thermal Adaptation in a Pathogenic Yeast
Source: PubMed Central journal article supplement (PMC3531498; doi:10.1371/journal.ppat.1003069), 2012-12-27
Supplement: ppat.1003069.s005.pdf [file ppat.1003069.s005.pdf]

**Table S1 - Primers**

|         |                          |                                                                                                       |
|---------|--------------------------|-------------------------------------------------------------------------------------------------------|
| oLC1117 | CaACT1-1012-F-SacI       | CCCGAGCTCGCTATTAAGATCACCAGCCT                                                                         |
| oLC1628 | Hsf1+114-R               | CCAAACAAATCGAGTAATGG                                                                                  |
| oLC1616 | CaHsp90-Linker-GFP-F     | GCTACTACTACTGCCTCAACTGACGAACCAGCTGGAGAATCTGCTATGGAAGAAGTT<br>GATGGTGGTGGTTCTAAAGGTGAAGAATTAT          |
| oLC1617 | CaHsp90-GFP/NAT-R        | TTATGTTATTACTCTCTAGATACACGATATTACAAAACCTATTTAACTAGAAAACCTGT<br><u>AGGTAAAACGACGGCCAGTGAATTC</u>       |
| oLC600  | JB-GFP+344-R             | CCTTCAAACCTTGACTTCAGC                                                                                 |
| oLC756  | HSP90+1051-F             | GCTGAAGAGTTGATTCCAGAAT                                                                                |
| oLC2285 | CaACT1+855-F             | GACCTTGAGATACCCAATTG                                                                                  |
| oLC2286 | CaACT1+1076-R            | CAGCTTGAATGGAAACGTAG                                                                                  |
| oLC2256 | CaPGA13+468-F            | CCAACCACTACATCTACTTC                                                                                  |
| oLC2257 | CaPGA13+665-R            | GGAACAACAACCTGTAGTTGG                                                                                 |
| oLC2262 | CaPMT4+1151-F            | GGAAATAGTTCCAACCTCTGG                                                                                 |
| oLC2263 | CaPMT4+1338-R            | CTCATTGTAACGTTGTTGGG                                                                                  |
| oLC2266 | CaRHR2+213-F             | GAAGAACAAGTCACTGCATG                                                                                  |
| oLC2267 | CaRHR2+399-R             | CAACCATTTGGTGGCTAATG                                                                                  |
| oLC754  | HSP90+832-F              | CCATCTGATATCACTCAAGATG                                                                                |
| oLC755  | HSP90+1040-R             | AGTGATAAACACTCTACGGACG                                                                                |
| oLC1620 | Hsp104+1402-F            | CGAGCTAGTCATGAACAATTG                                                                                 |
| oLC1621 | Hsp104+1660-R            | GGATACCAGTCAATCTAGCA                                                                                  |
| oLC2292 | CaCEK1-TAP-ARG4-F        | TAAAATGAAAGATCAATTAACAATTGAAGATTTGAAAAAATTGTTATATGAAGAGAT<br>TATGAAGCCATTAGGTTCGACGGATCCCCGGGTT       |
| oLC2251 | CaCEK1-HA-ARG4-R         | ACCAAGCCCAACCTATAGTTTTTAGTTTTAGTTTTAGTTTTAGTTTTAGCTTAACTTA<br><u>GCTTGACCTCTTCGATGAATTTCGAGCTCGTT</u> |
| oLC2252 | CaCEK1+1143-F            | CCTAATGATGAACCAATTAG                                                                                  |
| oLC2253 | CaCEK1+1376-R            | CCTATACAACAACAATTATGC                                                                                 |
| oLC1593 | TAP-R                    | TAAACTTTGGATGAAGGCG                                                                                   |
| oLC1594 | ARG4-F                   | ATGTTGGCTACTGATTTAGCTG                                                                                |
| oLC2364 | CaCEK1d Ext F (-436 bp)  | CTAGTTCAATTCCCATCAAC                                                                                  |
| oLC2365 | CaCEK1d Ext R (+1326 bp) | CTATTCTTCACACACGTTTAC                                                                                 |
| oLC274  | pJK863down-F             | CTGTCAAGGAGGGTATTCTGG                                                                                 |
| oLC275  | pJK863up-R               | AAAGTCAAAGTTCCAAGGGG                                                                                  |
